# Supplementary material for: A randomised, double-blind, parallel-group study to demonstrate equivalence in efficacy and safety of CT-P13 compared with innovator infliximab when coadministered with methotrexate in patients with active rheumatoid arthritis: the PLANETRA study
Source: HighWire-hosted journal article supplement (doi:10.1136/annrheumdis-2012-203090), 2013-05-18

## Appendix A.

### Figure S1-1. Comparative Fourier transform infrared (FTIR) between CT-P13 and INX.

CT-P13 and INX were analysed in a FTIR spectrometer and spectral data was plotted as a function of % transmission. CT-P13 A, B and C represent three different batches of CT-P13 drug.

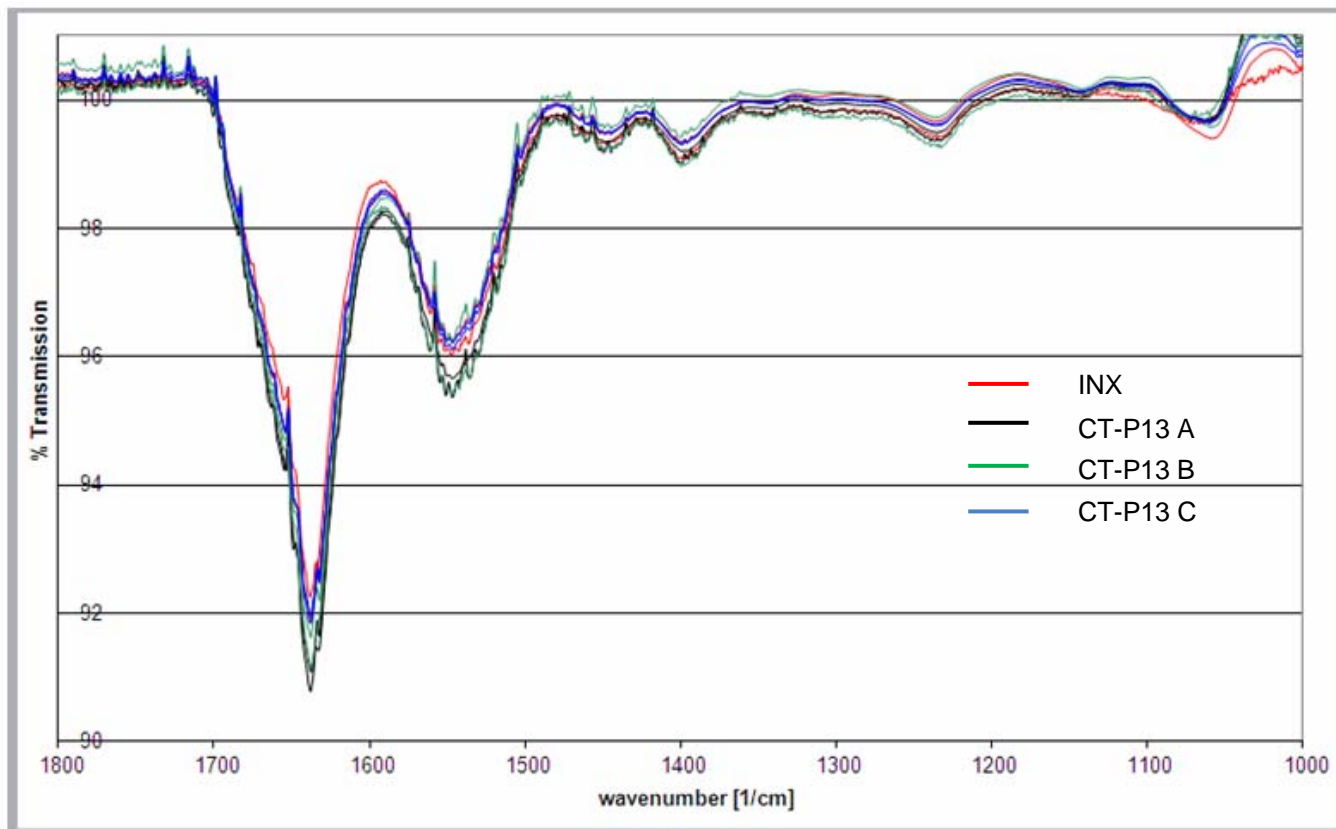

## Figure S1-2. Comparative TNF $\alpha$ neutralizing assay between CT-P13 and INX

CT-P13 compounds and INX were used in a TNF $\alpha$  neutralising assay. The EC<sub>50</sub> values of CT-P13 and INX were compared with the reference standard EC<sub>50</sub>. \*Relative neutralizing potency (%) of drug was calculated as a percentage of the reference standard EC<sub>50</sub>. The bold line indicates the average value for INX drug in this assay. CT-P13 A, B and C represent three different campaign batches of CT-P13 drug substance.

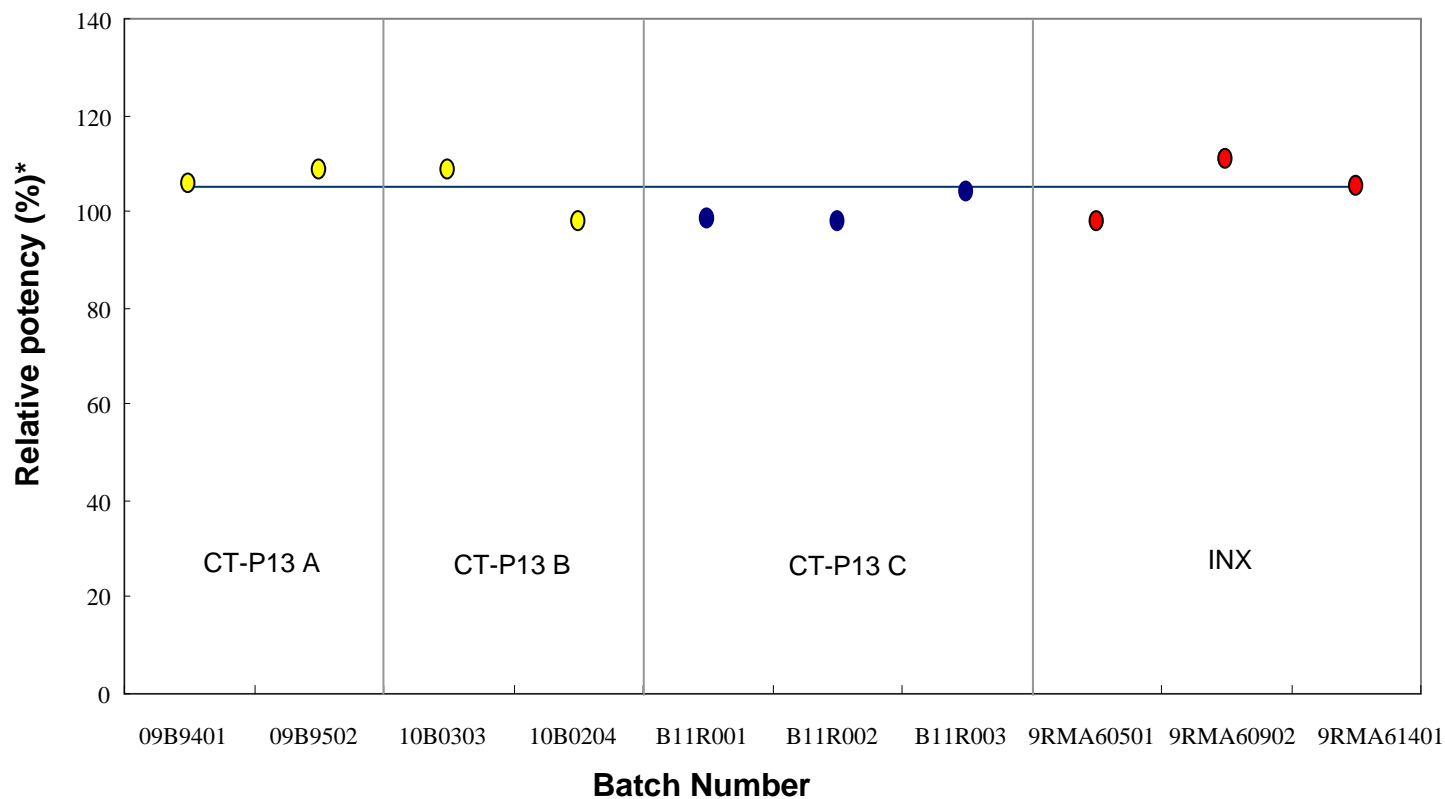

### Figure S1-3. Comparative complement dependent cytotoxicity (CDC) between CT-P13 and INX

CT-P13 and INX were used in a CDC assay. \*The relative CDC bioactivities of CT-P13 and INX were calculated as a percentage of the  $EC_{50}$  of each sample curve Vs the  $EC_{50}$  of the reference standard curve. Error bars represent standard deviation of each sample analysed in duplicate. The bold line indicates the average value for INX drug in this assay.

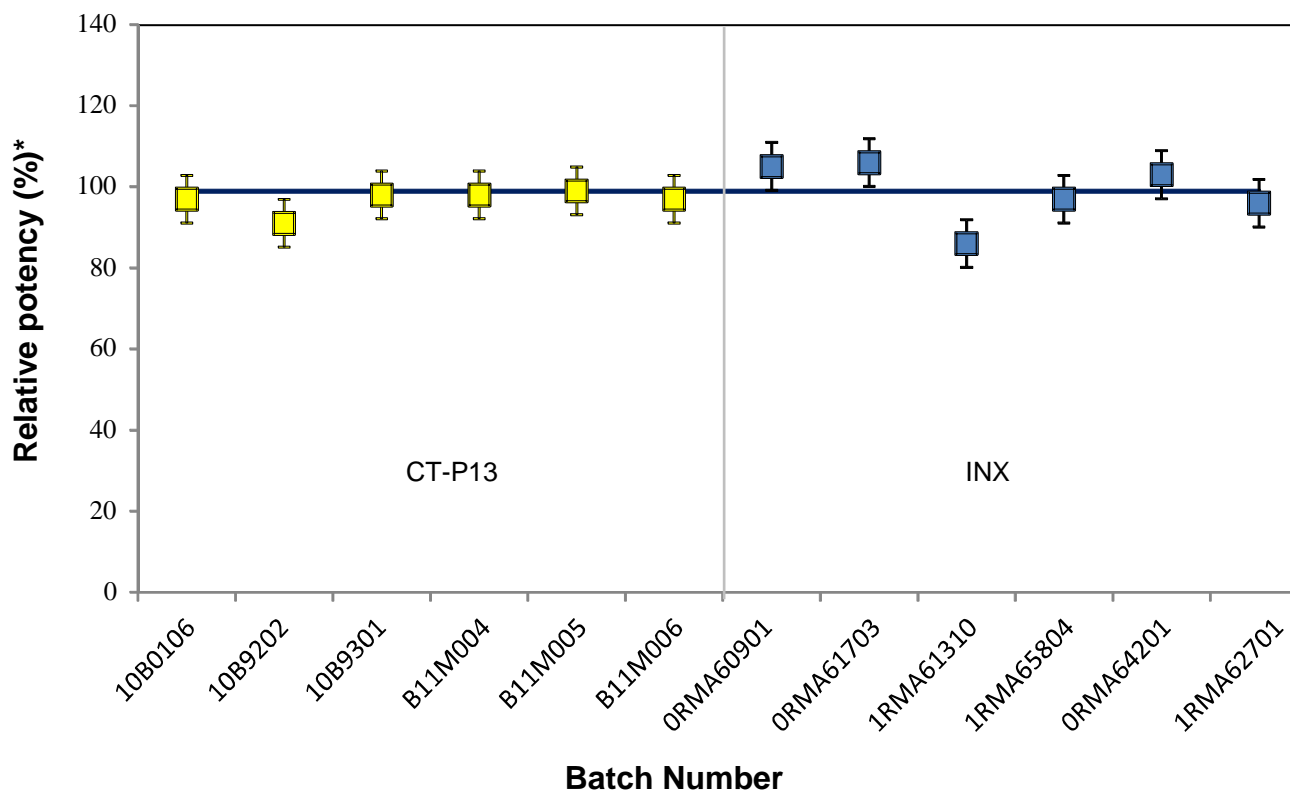

Supplement: annrheumdis-2012-203090supp_appendixA.pdf [file annrheumdis-2012-203090supp_appendixA.pdf]
